# Supplementary material
Source: Research Square preprint supplement (doi:10.21203/rs.3.rs-9144608/v1)
Supplement: Supplementary file 1 [file 40d47094eb53dfe5da0665ed.docx]

Supporting information for

**Colorimetric and fluorescent dual-mode detection of arsenic in oysters and living cells using N/S doped carbon dots**


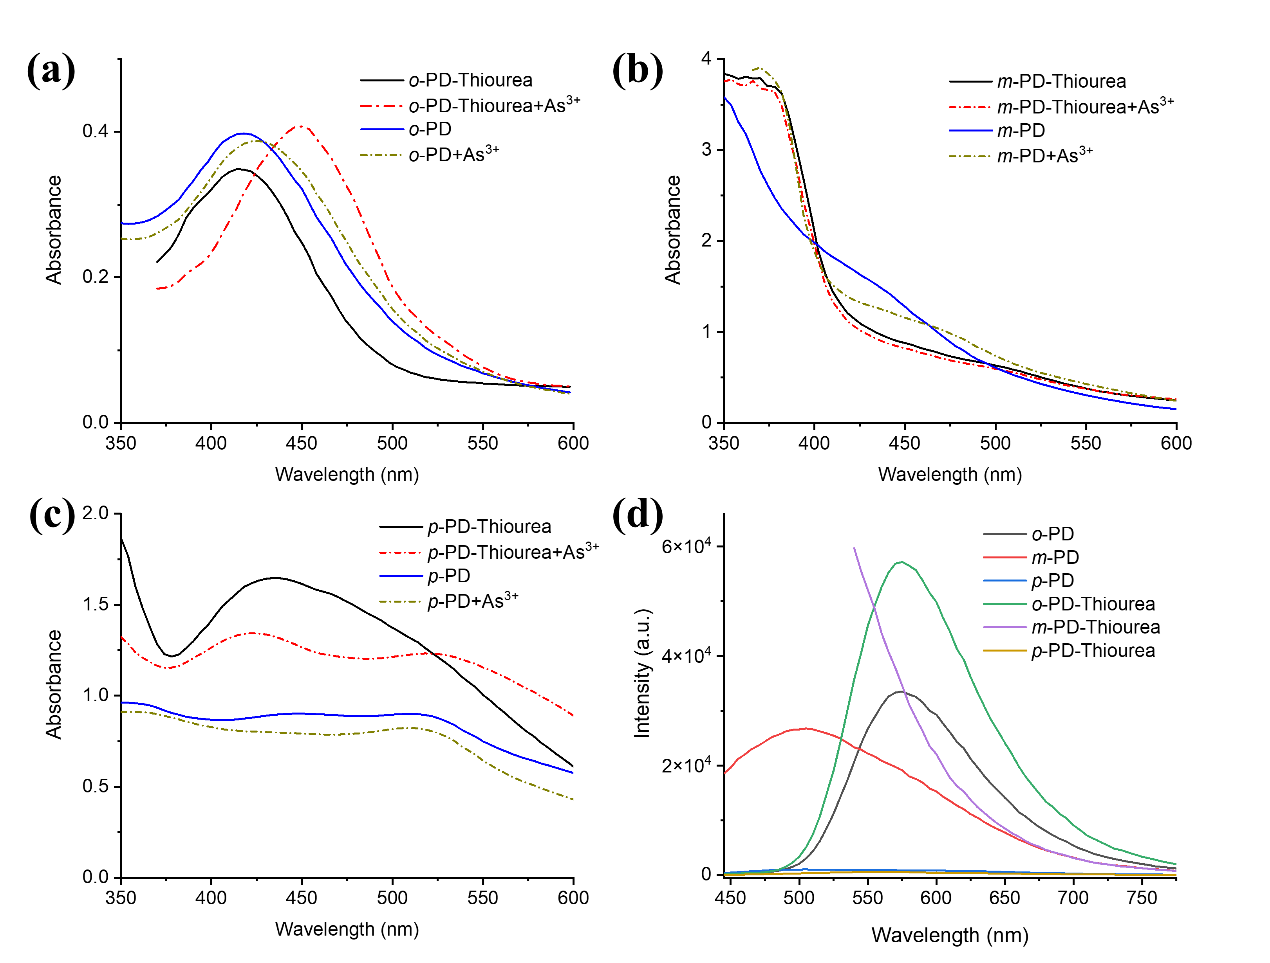


**Fig. S1**. (**a**-**c**) The absorption spectra of *o*-PD, *m*-PD, *p*-PD, *o*-PD-thiourea, *m*-PD-thiourea and *p*-PD-thiourea solutions in the absence and presence of As3+, at different pH values in the absence and presence of As3+. (**d**) The fluorescence spectra of *o*-PD, *m*-PD, *p*-PD, *o*-PD-thiourea, *m*-PD-thiourea and *p*-PD-thiourea solutions.


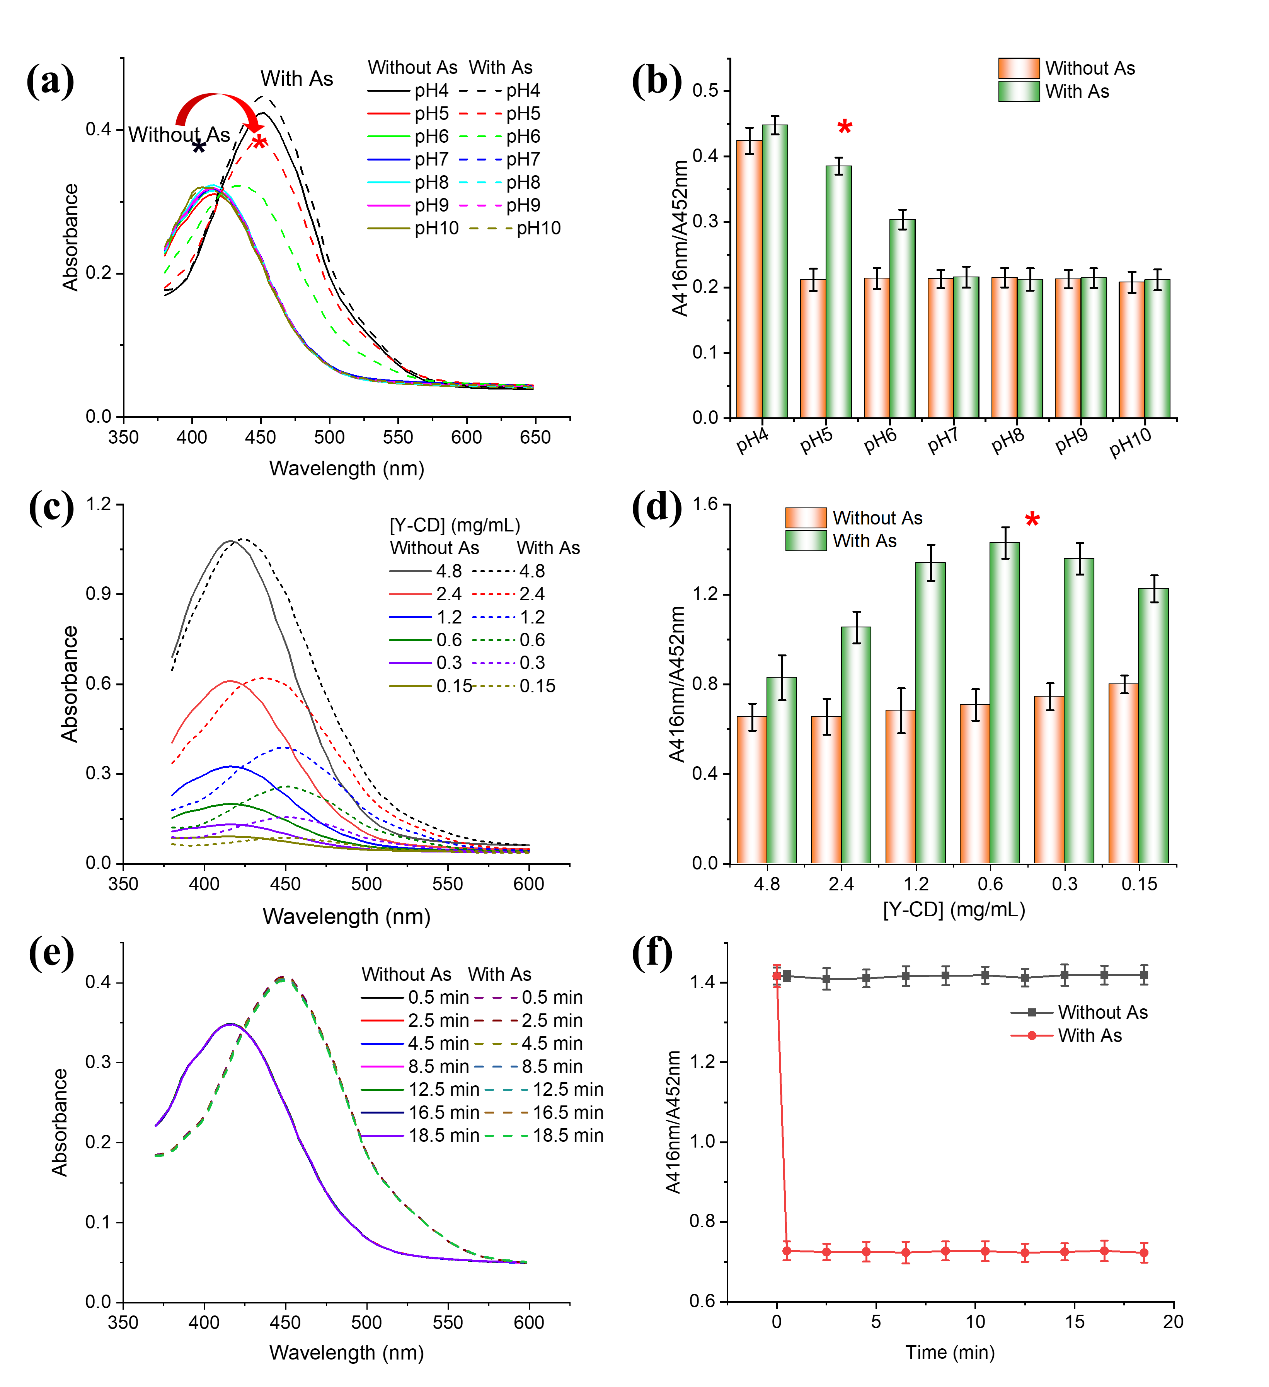


**Fig. S2**. Optimization of detection conditions. (**a**) the absorption spectra of Y-CD at different pH values in the absence and presence of As3+, (**b**) the ratio of absorbance at 416 nm to 452 nm for Y-CD solution at different pH values in the absence and presence of As3+, (**c**) the absorption spectra of Y-CD at different concentrations in the absence and presence of As3+, (**d**) the ratio of absorbance at 416 nm to 452 nm for Y-CD solutions at various concentrations in the absence and presence of As3+, (**e**) the absorption spectra of Y-CD after the addition of As3+ over different reaction time, (**f**) the ratio of absorbance at 416 nm to 452 nm for Y-CD after the addition of As3+ for different time. The error bars represent the relative standard deviation of three experimental results. The red asterisks in (**b**) and(**d**) denote the optimized experimental conditions.


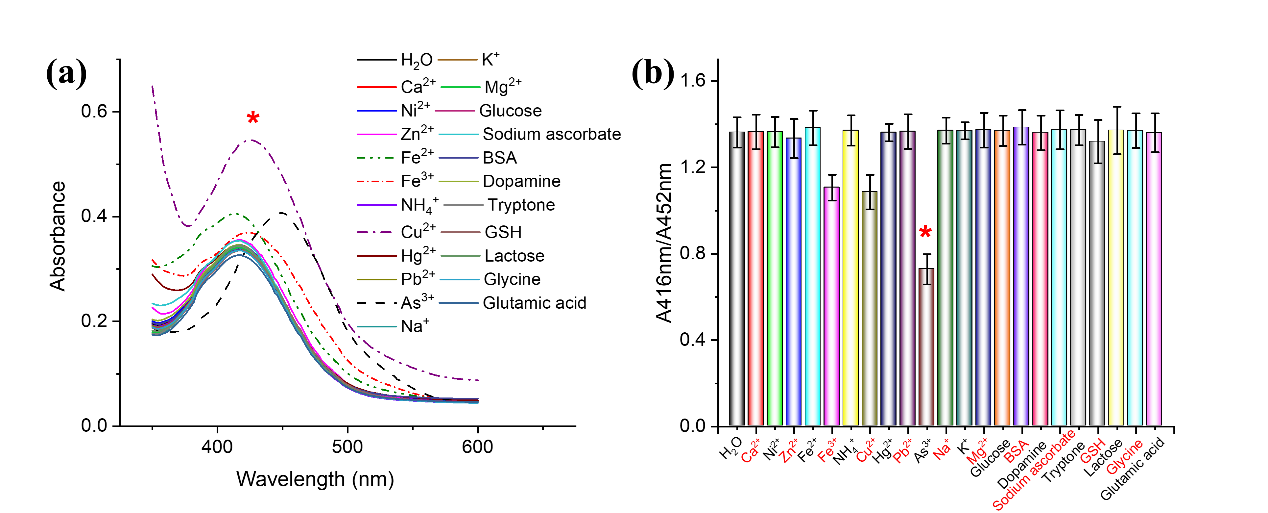


**Fig. S3**. The selectivity experiment. (**a**) The absorption spectra of Y-CD in the absence or presence of different species, (**b**) the ratio of absorbance at 416 nm and 452 nm of Y-CD in the absence or presence of different species. The error bars represent the relative standard deviation of three experimental results. The red asterisks indicate the sample in the presence of As3+.


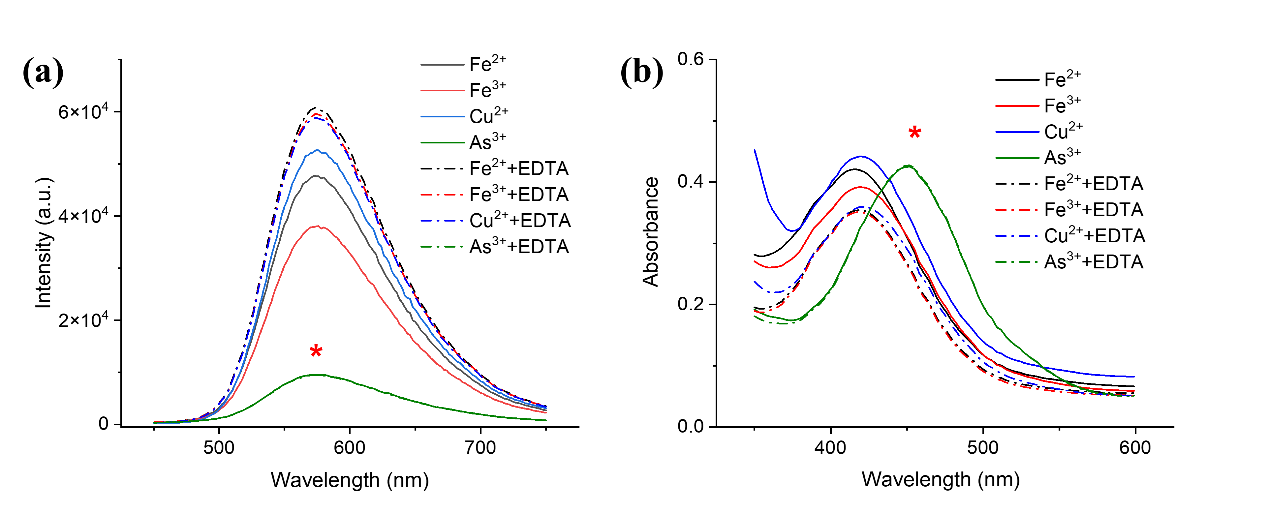


**Fig. S4**. The metal ion masking experiment. (**a**) The fluorescence spectra of Y-CD in the presence of different metal ions with or without EDTA as masking agents, (**b**) the absorption spectra of Y-CD in the presence of different metal ions with or without EDTA as masking agents. The red asterisks indicate the spectra of Y-CD in the presence of As3+ before and after the addition of EDTA.


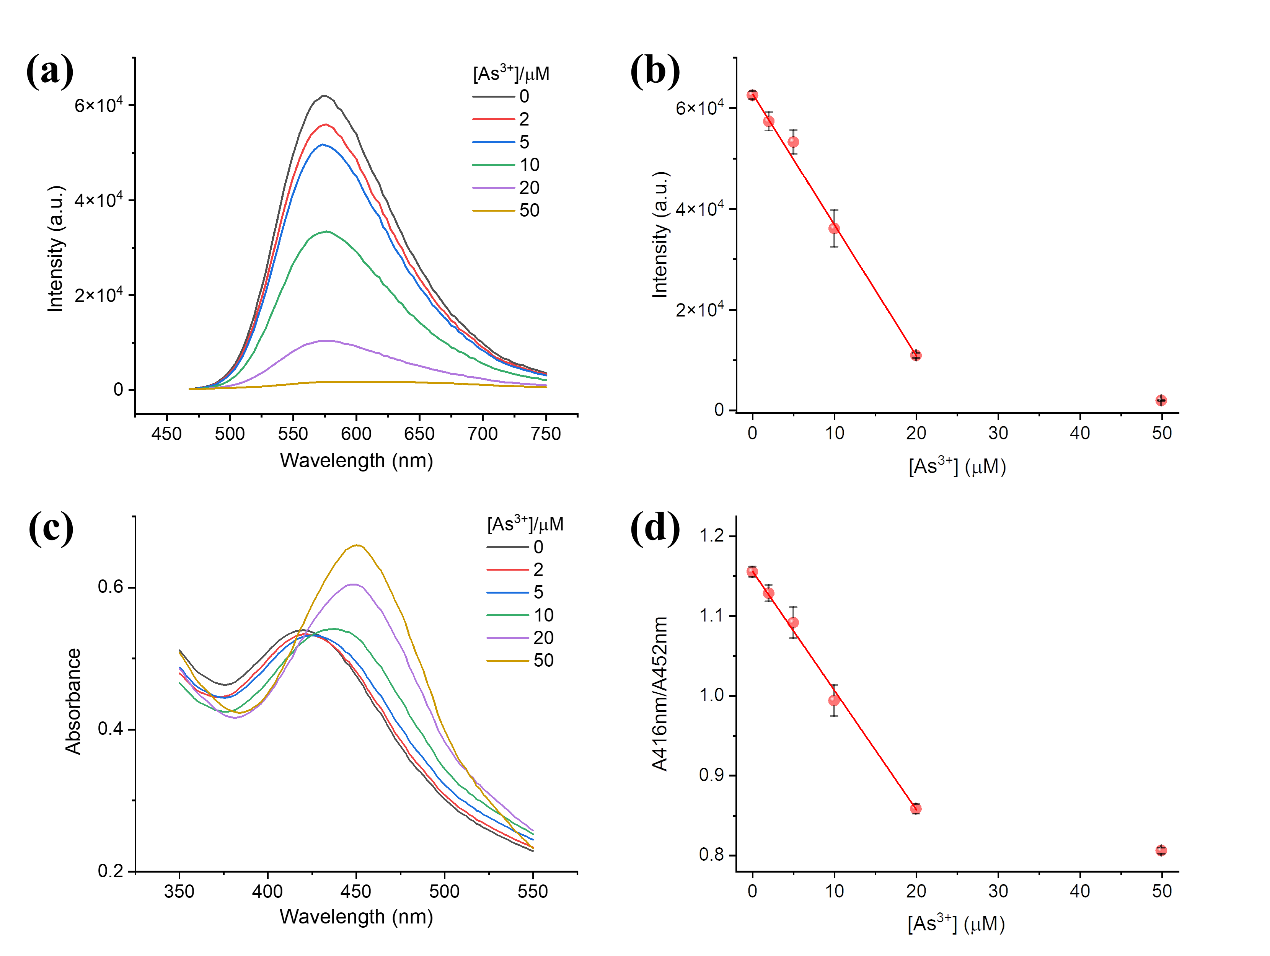


**Fig. S5**. The As3+ detection in real oyster samples. (**a**) The fluorescence spectra and (**b**) the corresponding fluorescence intensity at 575 nm of Y-CD in the presence of different concentrations of As3+ detected in oyster samples, (**c**) the absorption spectra and (**d**) the corresponding ratio of absorbance at 416 nm and 452 nm of Y-CD in the presence of different concentrations of As3+ detected in oyster samples. The error bars represent the relative standard deviation of three experimental results.
